# Supplementary material
Source: MDPI journal article supplement (https://www.mdpi.com/2674-1024/2/1/2)
Supplement: s1 [file s1]

## **Pre-sowing treatments, seed components and water imbibition aids seed germination of *Gloriosa superba***

Yogesh A. Mahajan<sup>1,2,3</sup>, Balkrishna A. Shinde<sup>1,3</sup>, Arun Torris<sup>4</sup>, Akshay B. Gade<sup>3</sup>, Vipul S. Patil<sup>5</sup>, C. K. John<sup>3</sup>, Narendra Y. Kadoo<sup>3,6\*</sup>, and Tukaram D. Nikam<sup>1\*</sup>

### **Supplementary Materials**

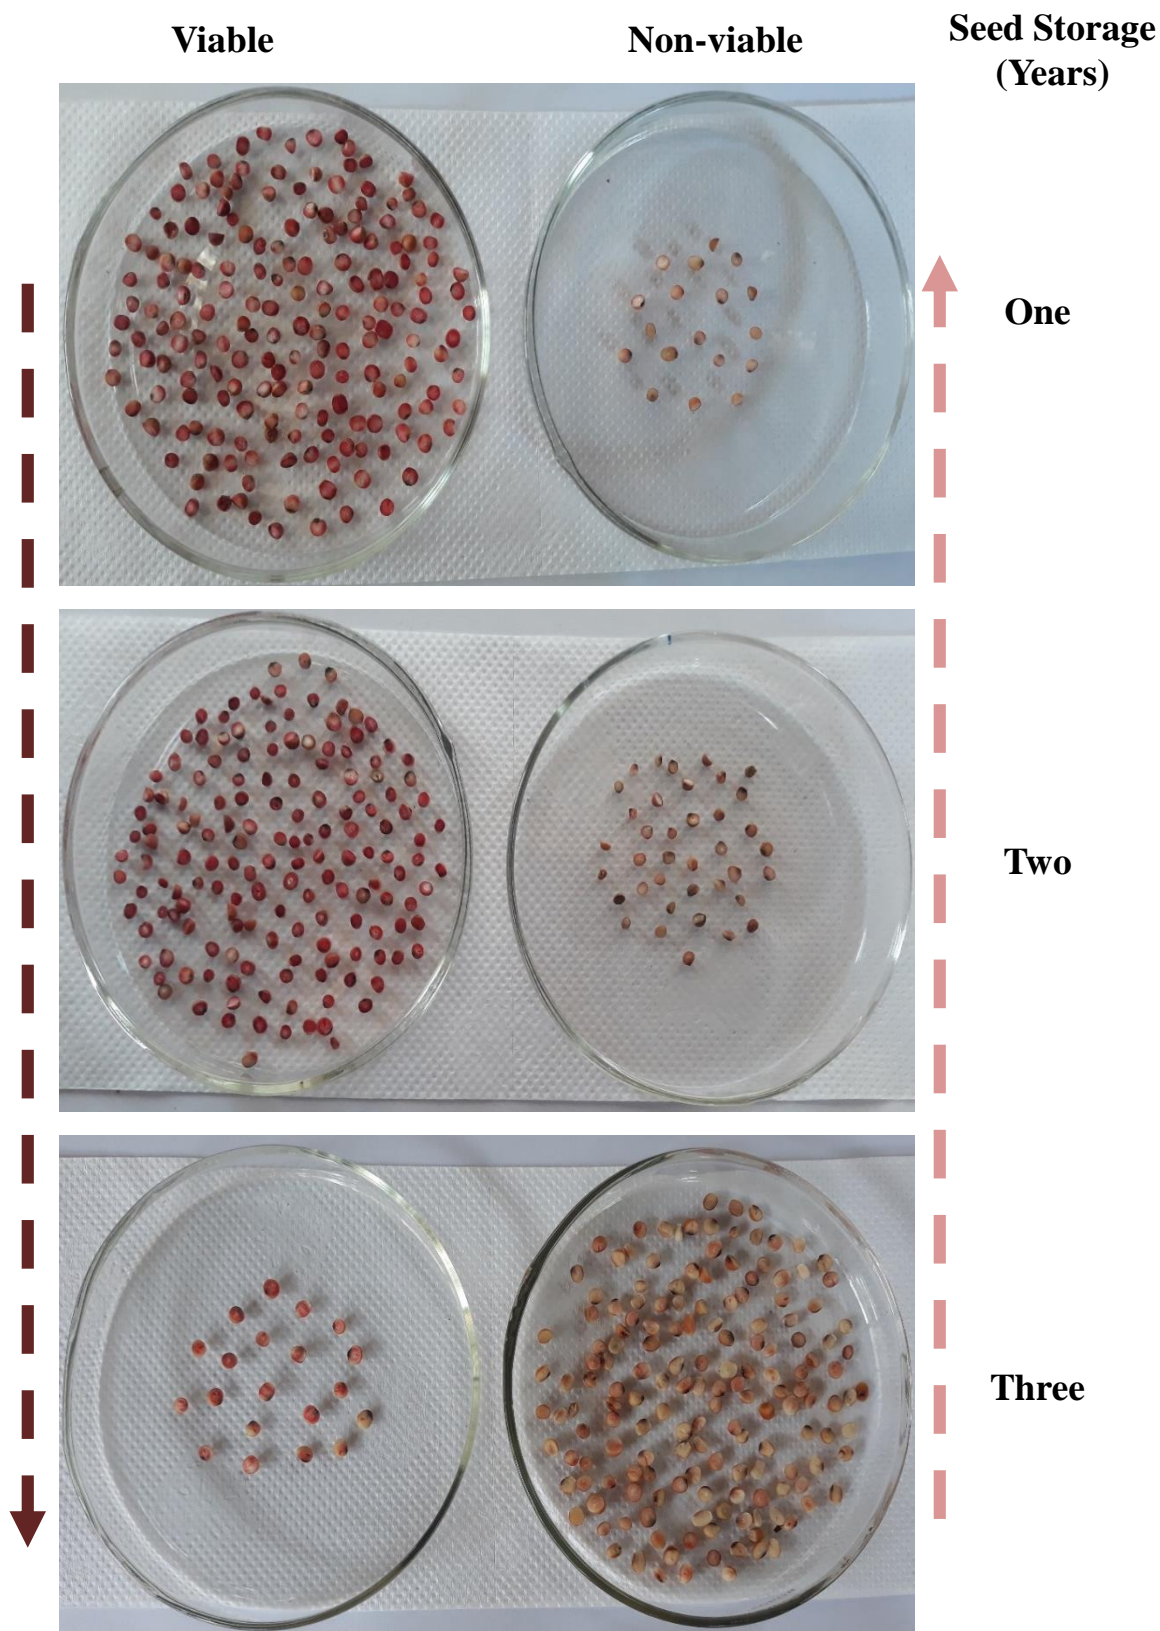

**Figure S1.** Effect of storage period on viability of seeds of *G. superba*: a. viable seeds embryo pink color and non-viable seeds embryo black color (after treating mechanically scarified seeds with 1% tetrazolium chloride (TZ) solution for 24 h)



*in vivo* 60 DAS

*in vitro* 30 DAS

Control

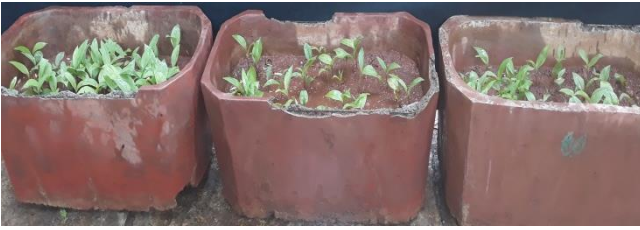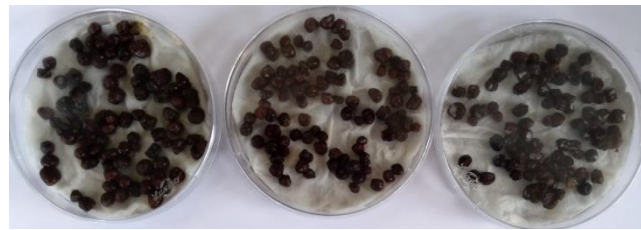

MS

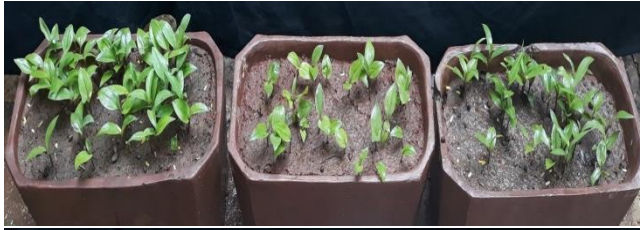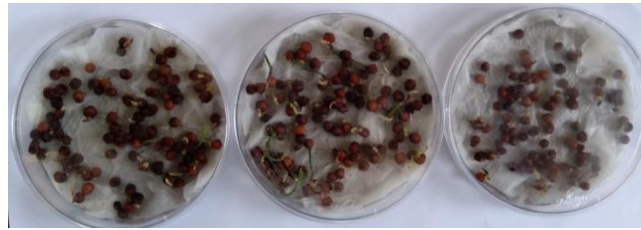

MS+  
WS  
24h

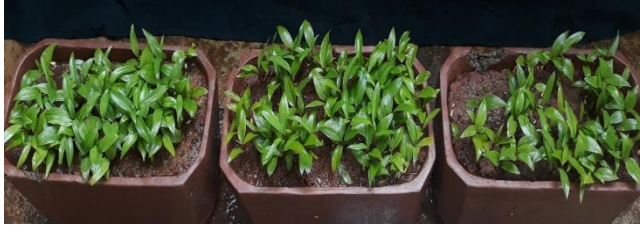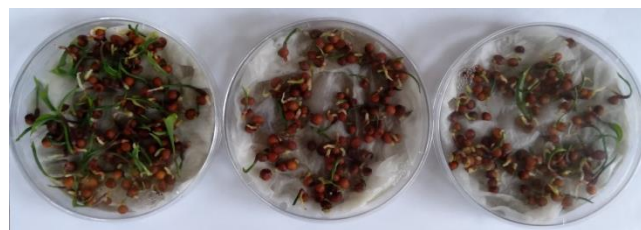

MS+  
WS  
48h

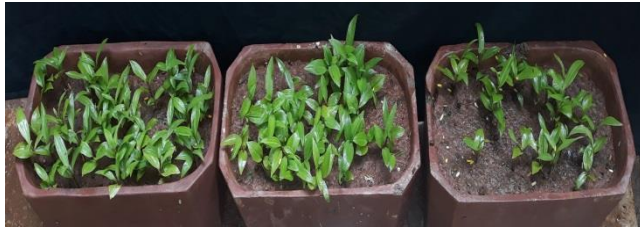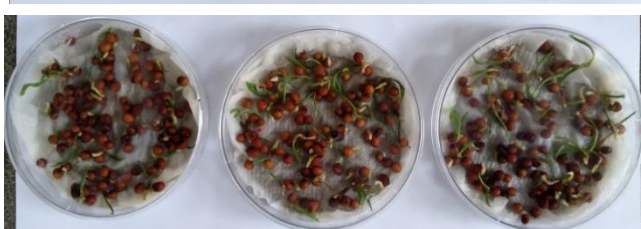

MS+  
WS  
72h

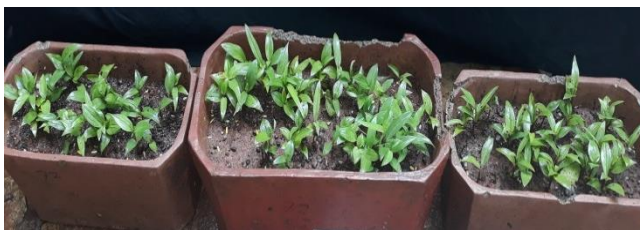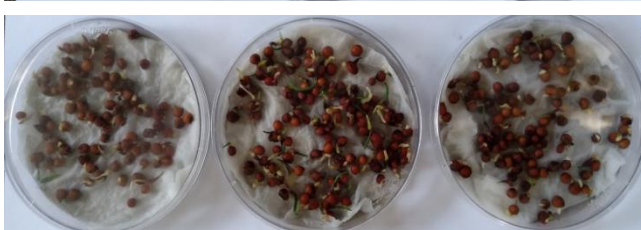

MS+  
WS  
96h

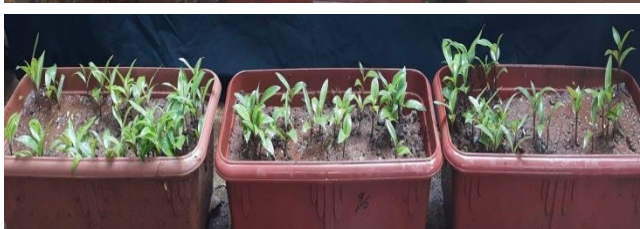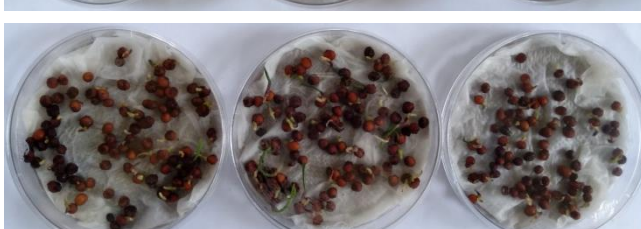

MS+  
WS  
120h

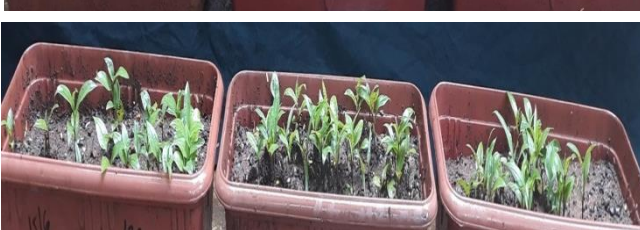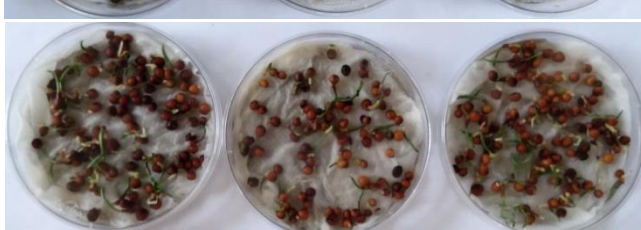

**Figure S2.** Germination of mechanically scarified seeds of *G. superba* in *in vivo* and *in vitro* condition after 60 days and *in vitro* condition after 30 days of sowing (n=100 in each replicate) DAS- days after sowing; Control- without mechanical scarification (MS) and water soaking (WS) at 0, 24, 48, 72, 96, 120 h



*in vivo* 60 DAS

*in vitro* 30 DAS

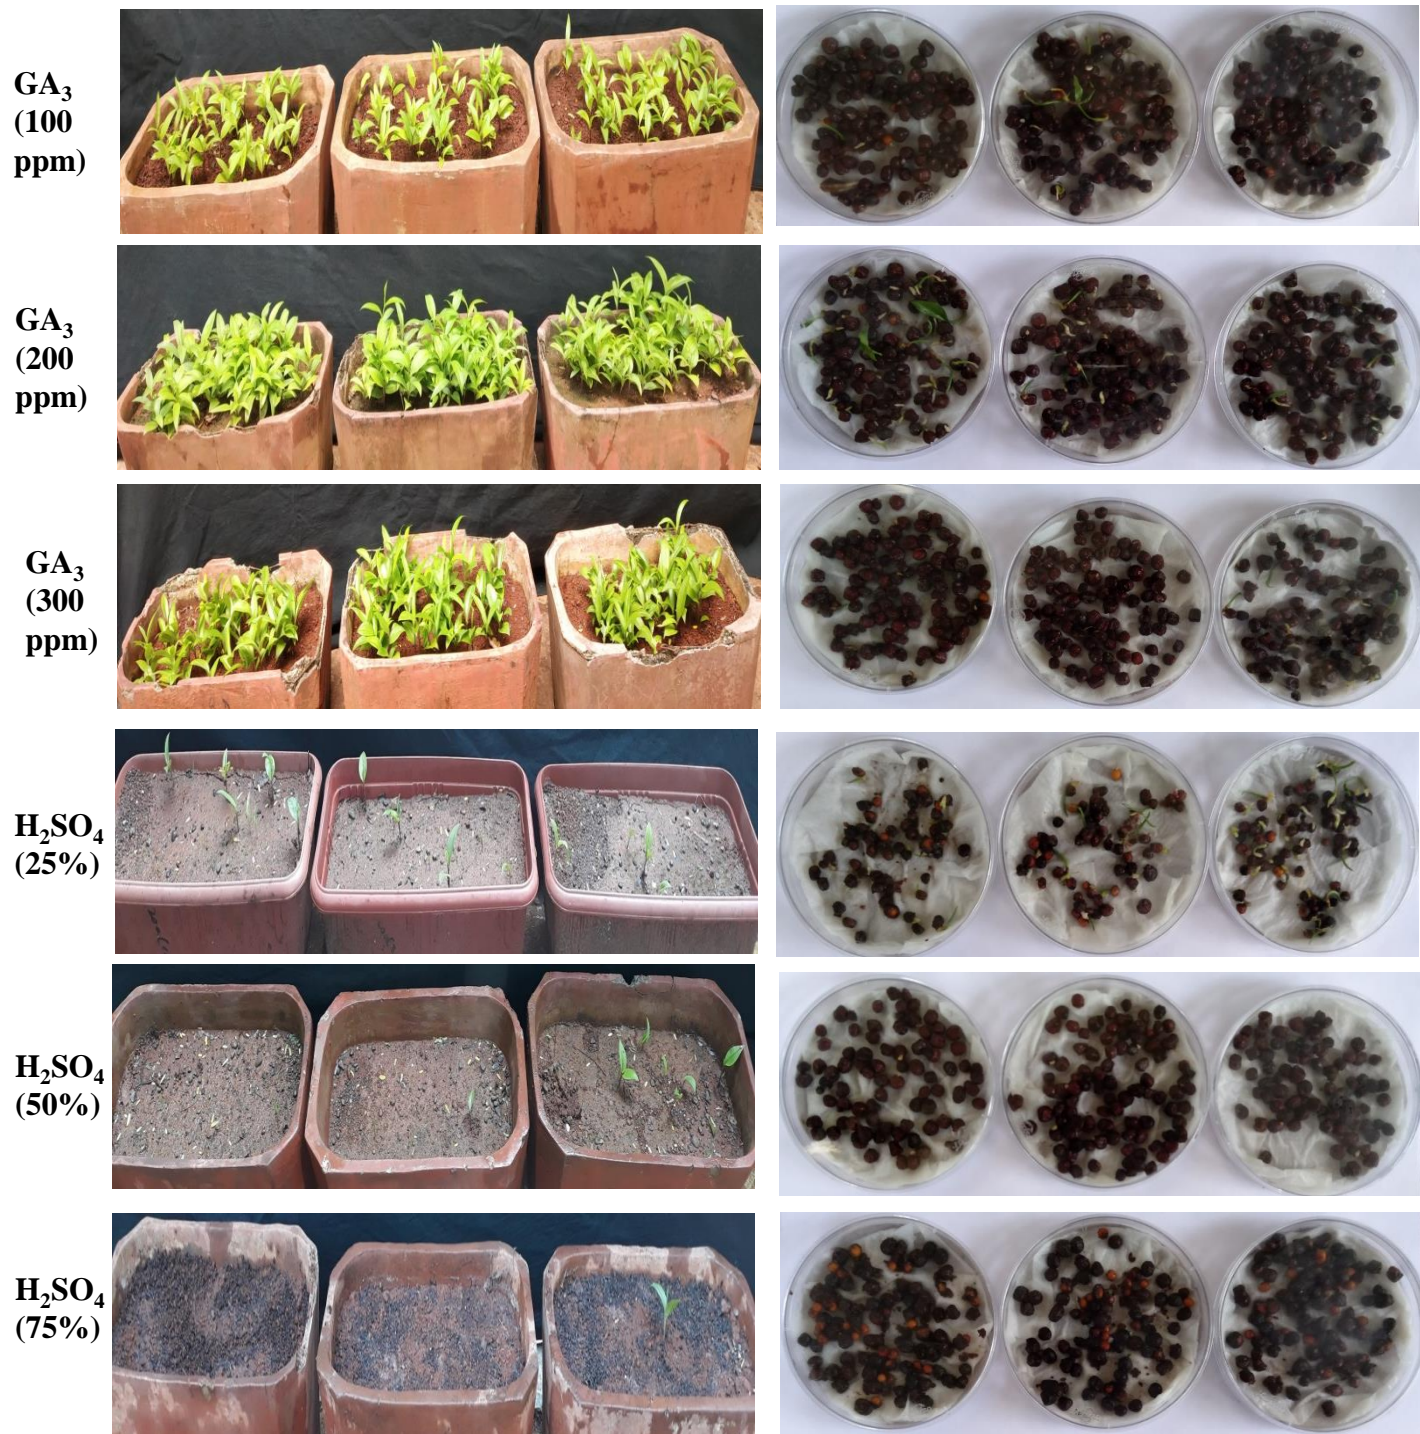

**Figure S3.** Influence of GA<sub>3</sub> and H<sub>2</sub>SO<sub>4</sub> treatments on *G. superba* seed germination *in vivo* condition after 60 days and *in vitro* condition after 30 days of sowing (n=100 in each replicate) DAS- days after sowing; GA<sub>3</sub>– treatment for 60 min and H<sub>2</sub>SO<sub>4</sub> treatment for 30 min

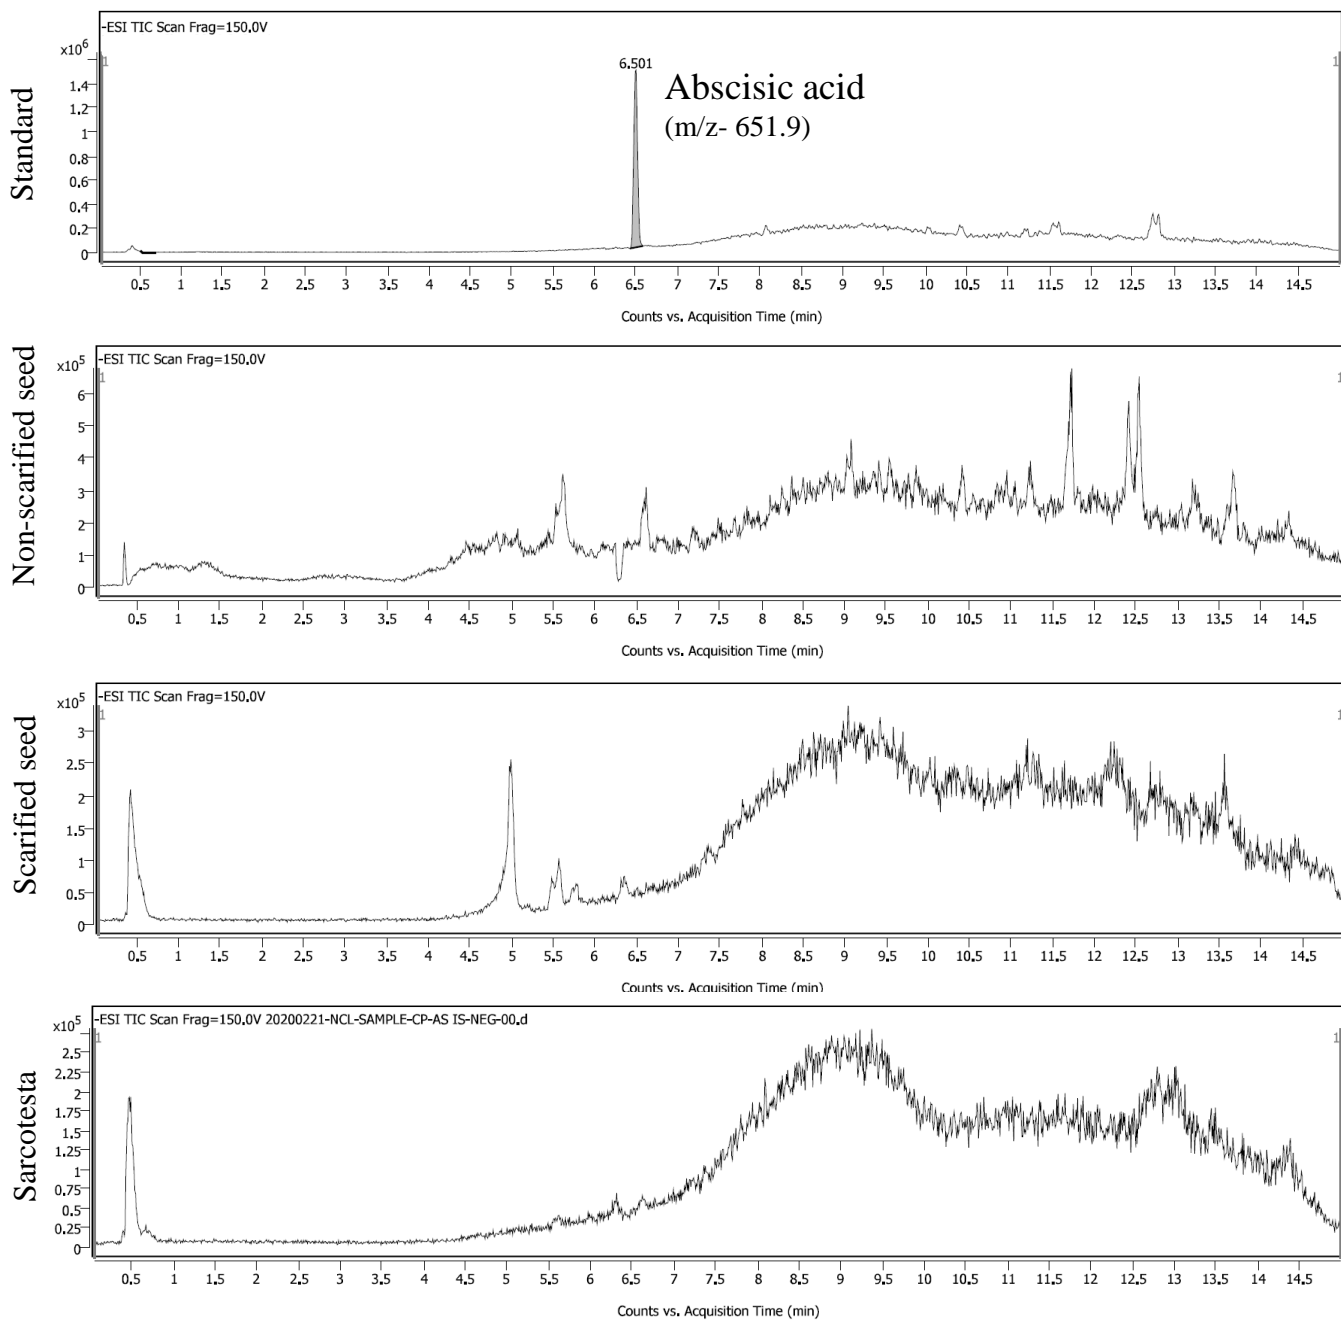

**Figure S4.** LC-MS chromatograph for detection of abscisic acid in non-scarified and scarified seeds and sarcotesta of seeds of *G. superba*

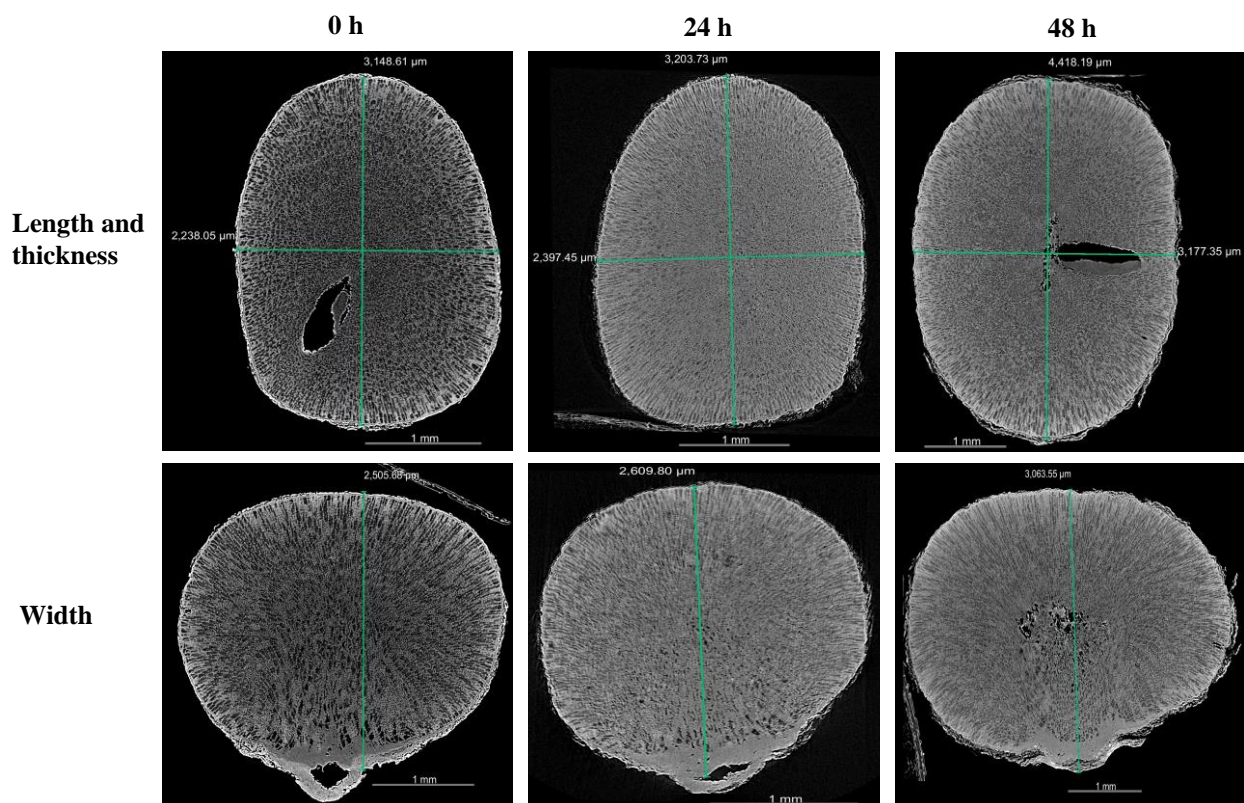

**Figure S5.** Illustration of Phenotypic details through micro-T of *G. superba* mechanically scarified seeds at 0, 24, and 48 h of imbibition.



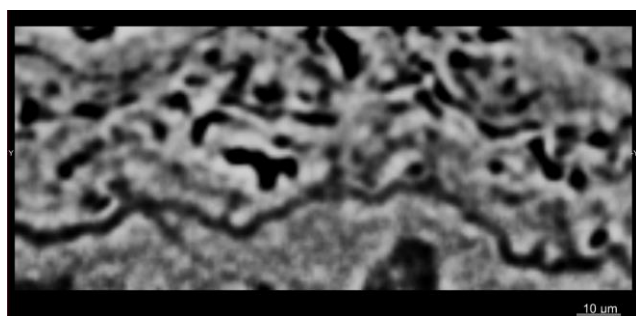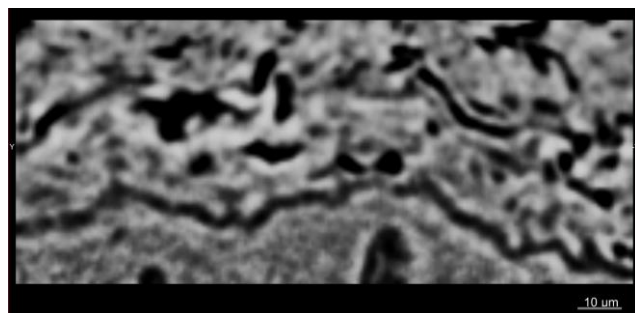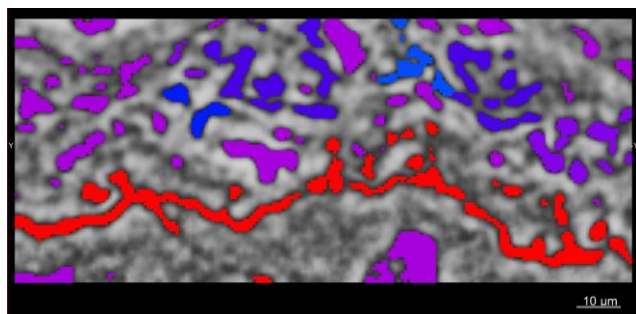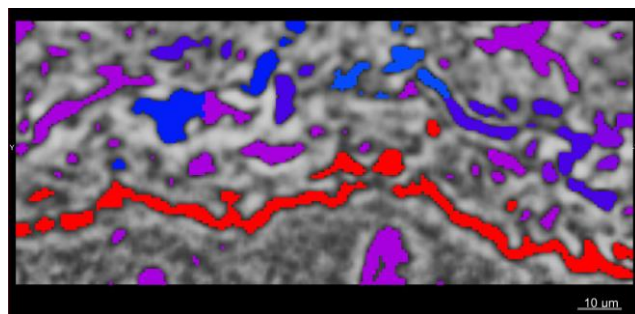

**Figure S6.** 2D image of pore network in tegmen of *G. superba* seed by micro-T

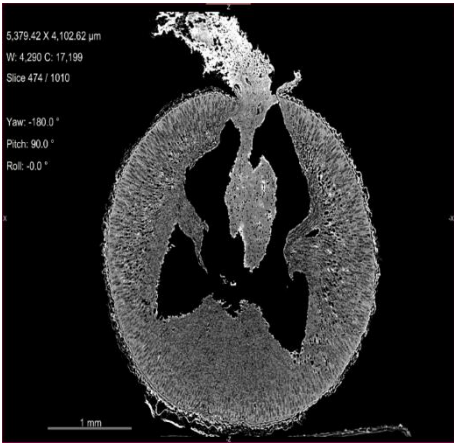

**A**

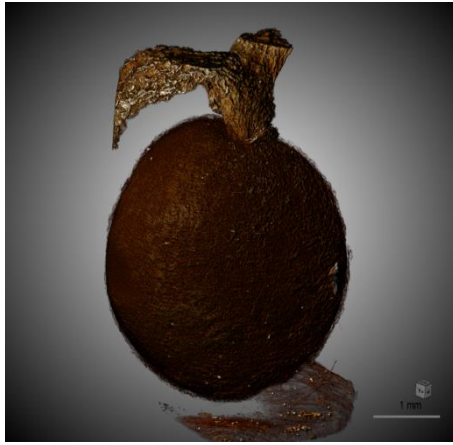

**B**

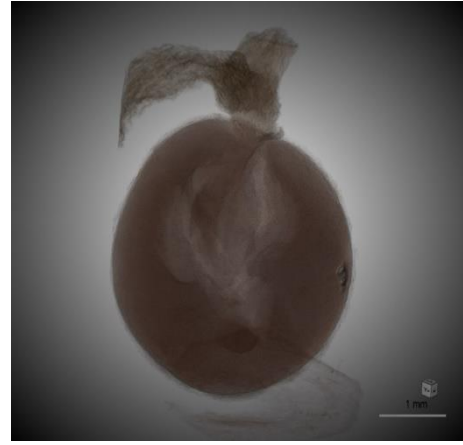

**C**

**Figure S7.** Visualization of germinated seed of *G. superba* using micro-T A) Germinated seed 2D cross-sectional image B) Germinated seed volume-rendered 3D image C) Germinated seed volume-rendered 3D image with defined grey-scale values



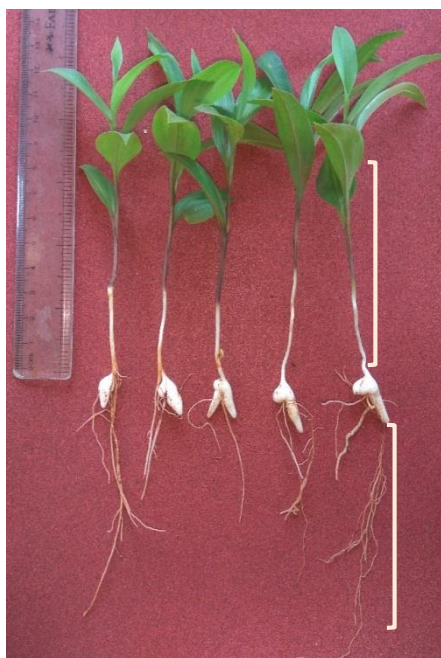

**A**

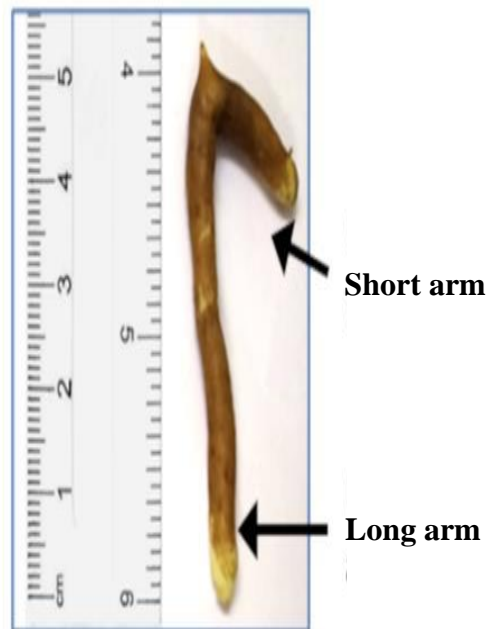

**B**

**Figure S8.** A) *G. superba* seedlings after 60 days of germination B) Tuber of *G. superba* after 120 days of germination

## Supplementary Tables

**Supplementary Table S1.** Effect of physical and chemical treatments on seed germination of *G. superba* in *in vivo* condition after 30 days (n=100)

| Treatment                            | Treatment Time (min/h) | Germination (%)                                | Minimum time required for germination (days) |
|--------------------------------------|------------------------|------------------------------------------------|----------------------------------------------|
|                                      |                        | 30 DAS<br>(Mean $\pm$ SE) <sup>\$</sup>        | (days $\pm$ SE) <sup>\$</sup>                |
| Control (without MS and WS)*         | 0 h                    | 23.00g $\pm$ 2.98                              | 34 <sup>h</sup> $\pm$ 3                      |
| MS (without WS)                      | 0 h                    | 56.00 <sup>d</sup> $\pm$ 1.50                  | 17 <sup>d</sup> $\pm$ 2                      |
| MS + WS                              | 24 h                   | <b>81.33<sup>a</sup> <math>\pm</math> 2.31</b> | <b>11<sup>a</sup> <math>\pm</math> 1</b>     |
| MS + WS                              | 48 h                   | 79.00 <sup>a</sup> $\pm$ 1.30                  | 13 <sup>b</sup> $\pm$ 1                      |
| MS + WS                              | 72 h                   | 77.00 <sup>b</sup> $\pm$ 1.01                  | 11 <sup>a</sup> $\pm$ 1                      |
| MS + WS                              | 96 h                   | 70.33 <sup>c</sup> $\pm$ 1.52                  | 11 <sup>a</sup> $\pm$ 1                      |
| MS + WS                              | 120 h                  | 57.33 <sup>d</sup> $\pm$ 1.61                  | 11 <sup>a</sup> $\pm$ 2                      |
| GA <sub>3</sub> (100 ppm)            | 60 min                 | 34.66 <sup>e</sup> $\pm$ 1.23                  | 14 <sup>c</sup> $\pm$ 2                      |
| GA <sub>3</sub> (200 ppm)            | 60 min                 | 27.66 <sup>f</sup> $\pm$ 1.09                  | 18 <sup>d</sup> $\pm$ 3                      |
| GA <sub>3</sub> (300 ppm)            | 60 min                 | 28.00 <sup>f</sup> $\pm$ 1.51                  | 24 <sup>f</sup> $\pm$ 1                      |
| H <sub>2</sub> SO <sub>4</sub> (25%) | 30 min                 | 41.00 <sup>e</sup> $\pm$ 2.12                  | 20 <sup>e</sup> $\pm$ 3                      |
| H <sub>2</sub> SO <sub>4</sub> (50%) | 30 min                 | 20.33 <sup>g</sup> $\pm$ 0.98                  | 37 <sup>i</sup> $\pm$ 4                      |
| H <sub>2</sub> SO <sub>4</sub> (75%) | 30 min                 | 7.66 <sup>h</sup> $\pm$ 1.23                   | 29 <sup>g</sup> $\pm$ 3                      |

**Notes:** The values are means of 100 seeds. \*MS- Mechanical scarification; WS- water soaking; DAS-days after sowing <sup>\$</sup>: The values appended with similar letters indicate non-significant differences, while those appended with different letters indicate significant differences ( $p < 0.05$ ); SE: Standard error of the mean.

**Supplementary Table S2.** Effect of physical and chemical treatments on seed germination of *G. superba* in *in vitro* condition after 30 days (n=100)

| Treatment                            | Treatment<br>Time (min/h) | Germination (%)<br>30 DAS<br>(Mean $\pm$ SE) <sup>\$</sup> | Minimum time required for<br>germination (days)<br>(days $\pm$ SE) <sup>\$</sup> |
|--------------------------------------|---------------------------|------------------------------------------------------------|----------------------------------------------------------------------------------|
| Control (without MS and WS)*         | 0 h                       | 33.00 <sup>f</sup> $\pm$ 1.56                              | 37 <sup>j</sup> $\pm$ 1                                                          |
| MS (without WS)                      | 0 h                       | 65.33 <sup>c</sup> $\pm$ 1.23                              | 09 <sup>d</sup> $\pm$ 1                                                          |
| MS + WS                              | 24 h                      | <b>85.33<sup>a</sup> <math>\pm</math> 3.21</b>             | 06 <sup>b</sup> $\pm$ 1                                                          |
| MS + WS                              | 48 h                      | 80.00 <sup>a</sup> $\pm$ 2.09                              | 08 <sup>c</sup> $\pm$ 2                                                          |
| MS + WS                              | 72 h                      | 73.33 <sup>b</sup> $\pm$ 1.81                              | <b>05<sup>a</sup> <math>\pm</math> 1</b>                                         |
| MS + WS                              | 96 h                      | 65.33 <sup>c</sup> $\pm$ 1.72                              | 06 <sup>b</sup> $\pm$ 1                                                          |
| MS + WS                              | 120 h                     | 59.00 <sup>d</sup> $\pm$ 1.31                              | 06 <sup>b</sup> $\pm$ 2                                                          |
| GA <sub>3</sub> (100 ppm)            | 60 min                    | 64.66 <sup>c</sup> $\pm$ 1.23                              | 11 <sup>f</sup> $\pm$ 2                                                          |
| GA <sub>3</sub> (200 ppm)            | 60 min                    | 70.00 <sup>b</sup> $\pm$ 1.29                              | 07 <sup>bc</sup> $\pm$ 2                                                         |
| GA <sub>3</sub> (300 ppm)            | 60 min                    | 68.66 <sup>b</sup> $\pm$ 1.21                              | 10 <sup>e</sup> $\pm$ 1                                                          |
| H <sub>2</sub> SO <sub>4</sub> (25%) | 30 min                    | 46.00 <sup>e</sup> $\pm$ 2.12                              | 18 <sup>g</sup> $\pm$ 1                                                          |
| H <sub>2</sub> SO <sub>4</sub> (50%) | 30 min                    | 25.00 <sup>g</sup> $\pm$ 0.98                              | 19 <sup>h</sup> $\pm$ 2                                                          |
| H <sub>2</sub> SO <sub>4</sub> (75%) | 30 min                    | 10.00 <sup>h</sup> $\pm$ 1.23                              | 20 <sup>i</sup> $\pm$ 2                                                          |

**Notes:** The values are means of 100 seeds. \*MS- Mechanical scarification; WS- water soaking; DAS-days after sowing <sup>\$</sup>: Numbers appended with similar letters indicate non-significant differences, while those appended with different letters indicate significant differences ( $p < 0.05$ ); SE: Standard error of the mean.



**Supplementary Table S3.** Effect of physical treatments on water uptake capacity of *G. superba* seeds during germination (n=100)

| Treatment        | Treatment<br>Time (h) | Seed diameter (mm) <sup>\$</sup>   | Seed weight (mg) <sup>\$</sup>         |
|------------------|-----------------------|------------------------------------|----------------------------------------|
| MS (without WS)* | 0 h                   | 3.0499 <sup>f</sup> ± 0.0925       | 0.024633 <sup>f</sup> ± 0.001885       |
| MS + WS          | 24 h                  | 3.8607 <sup>e</sup> ± 0.0815       | 0.044006 <sup>e</sup> ± 0.002417       |
| MS + WS          | 48 h                  | <b>4.2613<sup>a</sup> ± 0.1070</b> | <b>0.044309<sup>a</sup> ± 0.002612</b> |
| MS + WS          | 72 h                  | 4.2319 <sup>b</sup> ± 0.1534       | 0.044262 <sup>b</sup> ± 0.002664       |
| MS + WS          | 96 h                  | 4.2307 <sup>c</sup> ± 0.1124       | 0.044238 <sup>c</sup> ± 0.002605       |
| MS + WS          | 120 h                 | 4.1445 <sup>d</sup> ± 0.1501       | 0.044153 <sup>d</sup> ± 0.002494       |

**Notes:** The values are means of 100 seeds. \*MS- Mechanical scarification; WS- water soaking. <sup>\$</sup>: Numbers appended with similar letters indicate non-significant differences, while those appended with different letters indicate significant differences ( $p < 0.05$ ); SE: Standard error of the mean.

**Supplementary Table S4.** BET surface analysis (N<sub>2</sub>-adsorption–desorption) of *G. superba* seeds (n=6)

| <b>Sample ID</b>               | <b>Surface area <math>S_{\text{BET}}</math><br/>(m<sup>2</sup>/g)</b> | <b>Total Pore volume<br/>(cc/g)</b> | <b>Average pore size (nm)</b> |
|--------------------------------|-----------------------------------------------------------------------|-------------------------------------|-------------------------------|
| <b>Non scarified seed- NSS</b> | nd                                                                    | nd                                  | nd                            |
| <b>Scarified seed-SS</b>       | 11.77                                                                 | 0.0098                              | 1.67                          |

**Notes:** The values are means of six seeds. \* nd = not detected

**Supplementary Table S5.** Phenotypic details through micro-T of *G. superba* seeds (n=6)

| Phenotypic details           | Length (mm)                  | Thickness (mm)               | Width (mm)                   | Volume (mm <sup>3</sup> )     |
|------------------------------|------------------------------|------------------------------|------------------------------|-------------------------------|
| Scarified seed (0 h)         | 3.15 <sup>b</sup> ±0.79      | 2.22 <sup>b</sup> ±0.56      | 2.50 <sup>b</sup> ±0.63      | 10.70 <sup>c</sup> ±2.68      |
| Seed imbibition (after 24 h) | 3.20 <sup>b</sup> ±0.80      | 2.30 <sup>b</sup> ±0.58      | 2.60 <sup>b</sup> ±0.65      | 11.10 <sup>b</sup> ±2.78      |
| Seed imbibition (after 48 h) | <b>4.40<sup>a</sup>±1.10</b> | <b>2.90<sup>a</sup>±0.73</b> | <b>3.30<sup>a</sup>±0.83</b> | <b>14.60<sup>a</sup>±3.65</b> |

**Notes:** The values are means of six seeds ± SE (standard error of the mean). The values appended with similar letters indicate non-significant differences, while those appended with different letters indicate significant differences among the treatments ( $p < 0.05$ ).



**Supplementary Table S6.** Porosity of *G. superba* seeds (n=6)

| <b>Porosity</b>   | <b>Overall Porosity (%)</b>   | <b>Connected Pores (%)</b>    | <b>Non-connected Pores (%)</b> |
|-------------------|-------------------------------|-------------------------------|--------------------------------|
| <b>Sarcotesta</b> | 00.44 <sup>c</sup> ±0.10      | 0.00 <sup>c</sup> ±0.00       | 0.31 <sup>c</sup> ±0.13        |
| <b>Tegmen</b>     | <b>21.01<sup>a</sup>±5.25</b> | <b>17.50<sup>a</sup>±4.38</b> | <b>2.10<sup>a</sup>±0.53</b>   |
| <b>Endosperm</b>  | 01.30 <sup>b</sup> ±0.33      | 0.04 <sup>b</sup> ±0.01       | 1.20 <sup>b</sup> ±0.30        |

**Notes:** The values are means of six seeds ± SE (standard error of the mean). The values appended with similar letters indicate non-significant differences, while those appended with different letters indicate significant differences among the treatments ( $p < 0.05$ ).

**Supplementary Table S7.** Effect of physical and chemical treatments on growth performance of *G. superba* in *in vivo* condition 60 days after sowing (n=100)

| <b>Treatment</b>                         | <b>Treatment Time (min/h)</b> | <b>Shoot length (cm)<sup>\$</sup></b>         | <b>Tuber long arm length (cm)<sup>\$</sup></b> | <b>Tuber short arm length (cm)<sup>\$</sup></b> | <b>Vigor index (Mean <math>\pm</math> SE)<sup>\$</sup></b> |
|------------------------------------------|-------------------------------|-----------------------------------------------|------------------------------------------------|-------------------------------------------------|------------------------------------------------------------|
| <b>Control (without MS and WS)*</b>      | 0 h                           | 6.48 <sup>d</sup> $\pm$ 0.93                  | 0.80 <sup>d</sup> $\pm$ 0.03                   | 0.56 <sup>c</sup> $\pm$ 0.03                    | 149.04 <sup>g</sup> $\pm$ 11.52                            |
| <b>MS (without WS)</b>                   | 0 h                           | 6.89 <sup>c</sup> $\pm$ 0.38                  | 1.10 <sup>c</sup> $\pm$ 0.16                   | 0.59 <sup>d</sup> $\pm$ 0.16                    | 385.84 <sup>d</sup> $\pm$ 18.31                            |
| <b>MS + WS</b>                           | 24 h                          | 5.50 <sup>f</sup> $\pm$ 0.18                  | <b>1.90<sup>a</sup> <math>\pm</math> 0.69</b>  | <b>0.94<sup>a</sup> <math>\pm</math> 0.04</b>   | 434.50 <sup>c</sup> $\pm$ 23.05                            |
| <b>MS + WS</b>                           | 48 h                          | <b>8.45<sup>a</sup> <math>\pm</math> 0.38</b> | 1.45 <sup>b</sup> $\pm$ 0.33                   | 0.69 <sup>b</sup> $\pm$ 0.08                    | <b>667.55<sup>a</sup> <math>\pm</math> 34.91</b>           |
| <b>MS + WS</b>                           | 72 h                          | 6.85 <sup>c</sup> $\pm$ 0.17                  | 1.29 <sup>c</sup> $\pm$ 0.46                   | 0.59 <sup>d</sup> $\pm$ 0.06                    | 481.77 <sup>b</sup> $\pm$ 21.72                            |
| <b>MS + WS</b>                           | 96 h                          | 6.19 <sup>e</sup> $\pm$ 0.28                  | 1.17 <sup>c</sup> $\pm$ 0.87                   | 0.53 <sup>f</sup> $\pm$ 0.04                    | 435.34 <sup>c</sup> $\pm$ 21.21                            |
| <b>MS + WS</b>                           | 120 h                         | 7.61 <sup>b</sup> $\pm$ 1.03                  | 1.30 <sup>bc</sup> $\pm$ 0.45                  | 0.61 <sup>c</sup> $\pm$ 0.11                    | 380.50 <sup>d</sup> $\pm$ 11.98                            |
| <b>GA<sub>3</sub> (100 ppm)</b>          | 60 min                        | 5.61 <sup>f</sup> $\pm$ 1.19                  | 0.67 <sup>ef</sup> $\pm$ 0.05                  | 0.47 <sup>h</sup> $\pm$ 0.02                    | 194.44 <sup>f</sup> $\pm$ 18.33                            |
| <b>GA<sub>3</sub> (200 ppm)</b>          | 60 min                        | 4.64 <sup>g</sup> $\pm$ 0.89                  | 0.85 <sup>d</sup> $\pm$ 0.04                   | 0.50 <sup>g</sup> $\pm$ 0.06                    | 128.34 <sup>h</sup> $\pm$ 29.27                            |
| <b>GA<sub>3</sub> (300 ppm)</b>          | 60 min                        | 4.69 <sup>g</sup> $\pm$ 1.18                  | 0.70 <sup>e</sup> $\pm$ 0.18                   | 0.55 <sup>ef</sup> $\pm$ 0.09                   | 131.32 <sup>gh</sup> $\pm$ 11.11                           |
| <b>H<sub>2</sub>SO<sub>4</sub> (25%)</b> | 30 min                        | 6.21 <sup>e</sup> $\pm$ 1.58                  | 0.58 <sup>f</sup> $\pm$ 0.13                   | 0.37 <sup>j</sup> $\pm$ 0.02                    | 254.61 <sup>e</sup> $\pm$ 19.32                            |
| <b>H<sub>2</sub>SO<sub>4</sub> (50%)</b> | 30 min                        | 4.46 <sup>g</sup> $\pm$ 1.69                  | 0.60 <sup>f</sup> $\pm$ 0.09                   | 0.35 <sup>k</sup> $\pm$ 0.04                    | 90.67 <sup>i</sup> $\pm$ 12.87                             |
| <b>H<sub>2</sub>SO<sub>4</sub> (75%)</b> | 30 min                        | 4.57 <sup>g</sup> $\pm$ 0.89                  | 0.75 <sup>de</sup> $\pm$ 0.05                  | 0.45 <sup>i</sup> $\pm$ 0.09                    | 35.01 <sup>j</sup> $\pm$ 7.43                              |

**Notes:** The values are means of 100 seeds. \*MS- Mechanical scarification; WS- water soaking; <sup>\$</sup>: Numbers appended with similar letters indicate non-significant differences, while those appended with different letters indicate significant differences ( $p < 0.05$ ); SE: Standard error of the mean.

## Supplementary Videos

**Video S1.** Non-scarified seed (NSS) structure of *G. superba* seed by micro-T Phase-3D (<https://youtu.be/-59gs3GLBVE>)

**Video S2.** Scarified seed (SS) structure of *G. superba* seed by micro-T Phase-3D (<https://youtu.be/85Ae12Mu8LI>)

**Video S3.** Detailed segmentation of pores in sarcotesta of *G. superba* seed by micro-T Phase 3D (<https://youtu.be/78xTpYN1s1o>)

**Video S4.** Detailed segmentation of pores in sclerotesta of *G. superba* seed by micro-T Phase 3D (<https://youtu.be/TTGOBFxS97o>)

**Video S5.** Detailed segmentation of pores in endotesta of *G. superba* seed by micro-T Phase 3D (<https://youtu.be/Ga0RmYzBups>)

**Video S6.** Pore network in sclerotesta of *G. superba* seed by micro-T Phase 2D ([https://youtu.be/4AvZ-G\\_xZcA](https://youtu.be/4AvZ-G_xZcA))

**Video S7.** Mapping of hydration volume percentage of phosphotungstic acid (PTA) stain inside *G. superba* non-scarified seed (NSS) by micro-T Phase 2D (<https://youtu.be/yYDayFDbbAs>)

**Video S8.** Mapping of hydration volume percentage of phosphotungstic acid (PTA) stain inside *G. superba* mechanically scarified seed (SS) after 24 h of water imbibition by micro-T Phase 2D (<https://youtu.be/JS0ka9FmDMY>)

**Video S9.** Mapping of hydration volume percentage of phosphotungstic acid (PTA) stain inside *G. superba* mechanically scarified seed (SS) after 48 h of water imbibition by micro-T Phase 2D (<https://youtu.be/KLucSZ4PB2g>)

**Video S10.** Germinated *G. superba* seed using micro-T in Phase 2D and 3D (<https://youtu.be/OVRcO5cFC98>)
